# Supplementary material for: «Digesting Crohn’s Disease»: The Journey of Young Adults since Diagnosis
Source: MDPI journal article supplement (doi:10.3390/jcm12227128), 2023-11-16
Supplement: s1 [file s1]

**Table S1.** COREQ checklist (Consolidated criteria for reporting qualitative research).

| N° Item                                        | Guide questions/description                                                                                  | Page (explanation)      |
|------------------------------------------------|--------------------------------------------------------------------------------------------------------------|-------------------------|
| <i>Domain 1: Research team and reflexivity</i> |                                                                                                              |                         |
| <i>Personal Characteristics</i>                |                                                                                                              |                         |
| 1. Interviewer/facilitator                     | Which author/s conducted the interview or focus group?                                                       | 3                       |
| 2. Credentials                                 | What were the researcher's credentials?                                                                      | 3                       |
| 3. Occupation                                  | What was their occupation at the time of the study?                                                          | 3                       |
| 4. Gender                                      | Was the researcher male or female?                                                                           | 3                       |
| 5. Experience and training                     | What experience or training did the researcher have?                                                         | 3                       |
| <i>Relationship with participants</i>          |                                                                                                              |                         |
| 6. Relationship established                    | Was a relationship established prior to study commencement?                                                  | 3                       |
| 7. Participant knowledge of the interviewer.   | What did the participants know about the researcher? e.g. personal goals, reasons for doing the research     | 3                       |
| 8. Interviewer characteristics                 | What characteristics were reported about the interviewer/facilitator?                                        | 3                       |
| <i>Domain 2: study design</i>                  |                                                                                                              |                         |
| <i>Theoretical framework</i>                   |                                                                                                              |                         |
| 9. Methodological orientation and Theory       | What methodological orientation was stated to underpin the study?                                            | 5                       |
| <i>Participant selection</i>                   |                                                                                                              |                         |
| 10. Sampling                                   | How were participants selected?                                                                              | 3, 5                    |
| 11. Method of approach                         | How were participants approached?                                                                            | 3                       |
| 12. Sample size                                | How many participants were in the study?                                                                     | 5                       |
| 13. Non-participation                          | How many people refused to participate or dropped out? Reasons?                                              | 5                       |
| <i>Setting</i>                                 |                                                                                                              |                         |
| 14. Setting of data collection                 | Where was the data collected?                                                                                | 3                       |
| 15. Presence of non-participants               | Was anyone else present besides the participants and researchers?                                            | No                      |
| 16. Description of sample                      | What are the important characteristics of the sample?                                                        | 5, 6, Table 2           |
| <i>Data collection</i>                         |                                                                                                              |                         |
| 17. Interview guide                            | Were questions, prompts, guides provided by the authors? Was it pilot tested?                                | 4, Table 1              |
| 18. Repeat interviews                          | Were repeat interviews carried out? If yes, how many?                                                        | No                      |
| 19. Audio/visual recording                     | Did the research use audio or visual recording to collect the data?                                          | Yes, page 3             |
| 20. Field notes                                | Were field notes made during and/or after the interview or focus group?                                      | No                      |
| 21. Duration                                   | What was the duration of the interviews or focus group?                                                      | 23 - 75 min, page 5-6   |
| 22. Data saturation                            | Was data saturation discussed?                                                                               | 5                       |
| 23. Transcripts returned                       | Were transcripts returned to participants for comment and/or correction?                                     | No                      |
| <i>Domain 3: analysis and findings</i>         |                                                                                                              |                         |
| <i>Data analysis</i>                           |                                                                                                              |                         |
| 24. Number of data coders                      | How many data coders coded the data?                                                                         | 2, pages 4-5            |
| 25. Description of the coding tree             | Did authors provide a description of the coding tree?                                                        | 7-13, Figure 1          |
| 26. Derivation of themes                       | Were themes identified in advance or derived from the data?                                                  | Derived from data, p3-4 |
| 27. Software                                   | What software, if applicable, was used to manage the data?                                                   | Nvivo, page 4           |
| 28. Participant checking                       | Did participants provide feedback on the findings?                                                           | No                      |
| <i>Reporting</i>                               |                                                                                                              |                         |
| 29. Quotations presented                       | Were participant quotations presented to illustrate the themes / findings?<br>Was each quotation identified? | Yes, pages 7-12         |
| 30. Data and findings consistent               | Was there consistency between the data presented and the findings?                                           | 12-13                   |
| 31. Clarity of major themes                    | Were major themes clearly presented in the findings?                                                         | 7-12, Figure 1          |
| 32. Clarity of minor themes                    | Is there a description of diverse cases or discussion of minor themes?                                       | 7-13                    |

## Reference:

1. Tong A, Sainsbury P, Craig J (2007) Consolidated criteria for reporting qualitative research (COREQ): a 32-item checklist for interviews and focus groups. *Int J Qual Health Care* 19: 349-357.
